# Supplementary material for: The chemotherapeutic drug oxaliplatin differentially affects blood DC function dependent on environmental cues
Source: Springer Nature journal article supplement (doi:10.1007/s00262-011-1189-x), 2011-12-22
Supplement: MOESM1 [file 8231870]

## Supplemental Figures

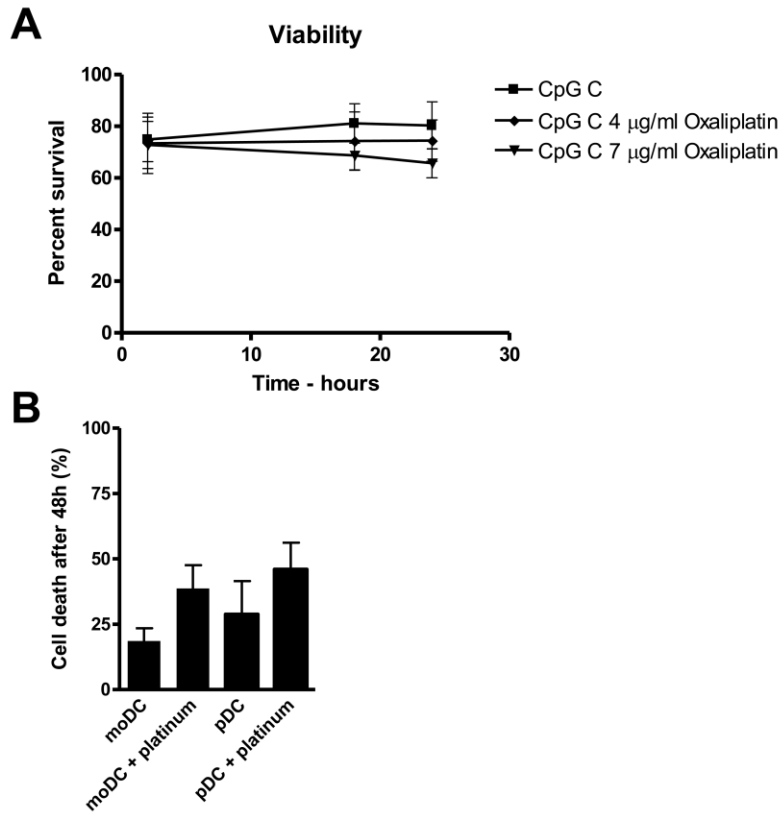

### Supplemental Figure 1

(A) Viability, percentage PI<sup>-</sup>/Annexin V<sup>+</sup>, of pDCs after overnight incubation with CpG C (■), CpG C + 4  $\mu\text{g/ml}$  oxaliplatin (◆) and CpG C + 7  $\mu\text{g/ml}$  oxaliplatin (▼). (B) The graph shows the percentage cell death of moDCs or pDCs cultured in the presence or absence of oxaliplatin after 48 hours culture.

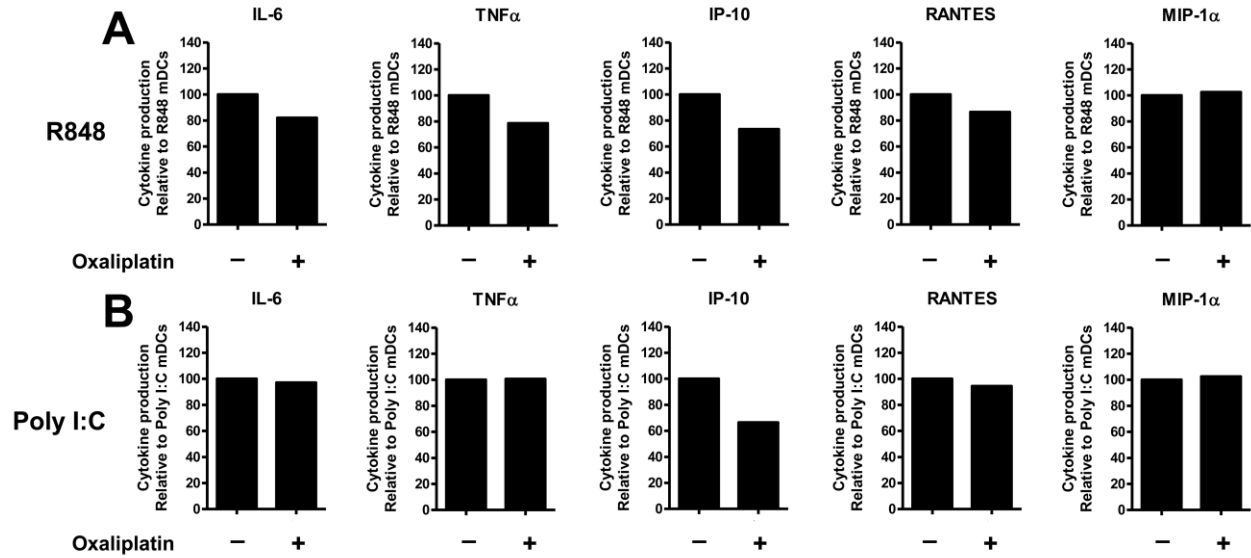

### Supplemental Figure 2 Oxaliplatin modulates the TLR-induced mDC cytokine profile

Supernatants of mDC cultures following incubation with R848 (A) or Poly I:C (B) with or without oxaliplatin were analyzed for the presence IL-6, TNF $\alpha$ , IP-10, RANTES, MIP-1 $\alpha$  and IFN $\alpha$ . The graphs show cytokine and chemokine production relative to pDCs activated in the absence oxaliplatin. Data shown are the results of one experiment.

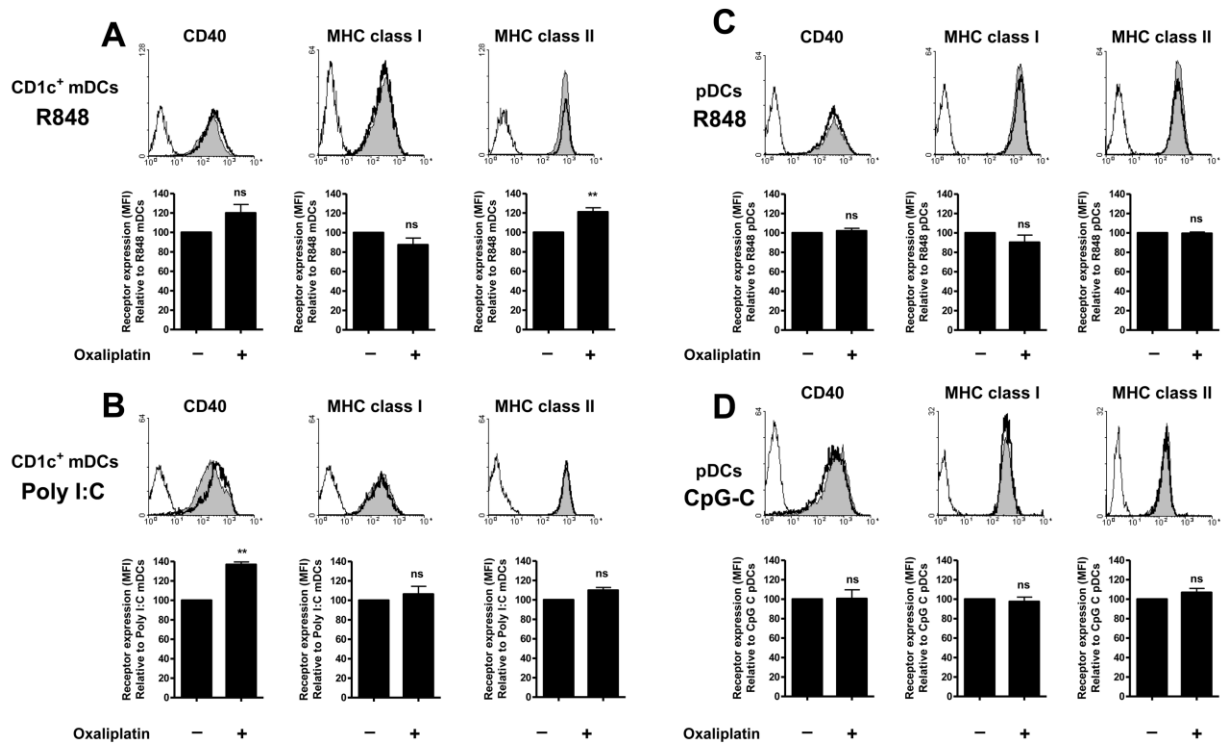

### Supplemental Figure 3 Oxaliplatin modulates the TLR induced human blood DC phenotype

Freshly isolated CD1c<sup>+</sup> mDCs and pDCs were activated overnight with either R848 or Poly I:C, for mDCs, and with R848 or CpG-C, for pDCs, with or without 7  $\mu$ g/ml oxaliplatin. Histograms show the TLR-induced receptor expression levels of the surface molecules CD40, MHC class I and II on pDCs/mDCs (grey filled) compared to expression levels of oxaliplatin treated TLR-activated pDCs/mDCs (thick black lines) and the appropriate isotype control (thin black line). Graphs show the receptor expression levels of the surface molecules CD40 and MHC class I and II of pDCs/mDCs relative to R848 (A), Poly I:C (B) activated mDCs or R848 (C), CpG-C (D) activated pDCs. Data shown are mean values of at least three independent experiments  $\pm$  SEM.

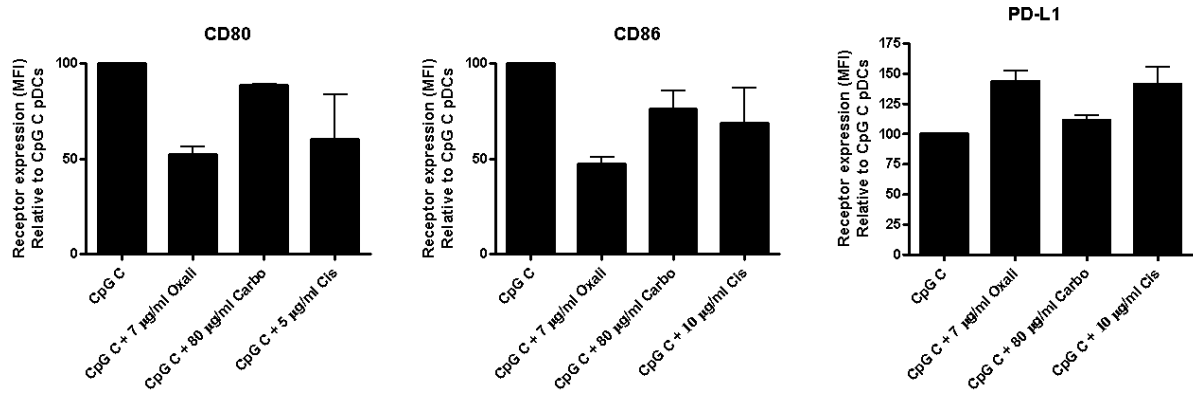

**Supplemental Figure 4 Platinum compounds impair CpG-C induced CD80 and CD86, but enhance PD-L1 expression on human pDCs**

Freshly isolated pDCs were activated overnight with CpG-C with or without 7 µg/ml oxaliplatin, 80 µg/ml carboplatin or 5 µg/ml cisplatin. Graphs show the receptor expression levels of the surface molecules CD80, CD86 and PD-L1 of pDCs relative to CpG-C activated pDCs. Data shown are mean values of at least three independent experiments ± SEM.
